# Supplementary material for: Sex-Related Differences in Regional Blood–Brain Barrier Integrity in Non-Demented Elderly Subjects
Source: PubMed Central journal article supplement (PMC8001339; doi:10.3390/ijms22062860), 2021-03-11
Supplement: ijms-22-02860-s001.pdf [file ijms-22-02860-s001.pdf]

Supplementary Tables and Figures

Supplementary Table S1. Volume ratio of each cortical regions

|                               | <b>Total</b> | <b>Male</b>  | <b>Female</b> | <b><i>p</i>-value</b> |
|-------------------------------|--------------|--------------|---------------|-----------------------|
| <b>VR of Cingulate cortex</b> | 5.35 ± 0.58  | 5.14 ± 0.64  | 5.44 ± 0.53   | 0.038                 |
| <b>VR of Frontal cortex</b>   | 36.63 ± 3.16 | 34.96 ± 3.18 | 37.42 ± 2.84  | 0.001                 |
| <b>VR of Insular cortex</b>   | 4.35 ± 0.37  | 4.19 ± 0.39  | 4.43 ± 0.33   | 0.007                 |
| <b>VR of Occipital cortex</b> | 1.66 ± 0.66  | 1.54 ± 0.62  | 1.72 ± 0.68   | 0.280                 |
| <b>VR of Parietal cortex</b>  | 16.05 ± 2.64 | 14.79 ± 3.14 | 16.64 ± 2.15  | 0.004                 |
| <b>VR of Temporal cortex</b>  | 29.69 ± 2.50 | 28.55 ± 2.44 | 30.23 ± 2.37  | 0.006                 |

VR: volume ratio which is calculated by volume of each cortical region divided by intracranial volume.

Supplementary Tables and Figures

Supplementary Table S2. MR protocol details.

|                             | <b>3D MPRAGE</b> | <b>3D FLAIR</b> | <b>3D SWI</b> | <b>DCE-MRI</b>                        |
|-----------------------------|------------------|-----------------|---------------|---------------------------------------|
| <b>TR (ms)</b>              | 2300             | 5000            | 29            | 3.1                                   |
| <b>TE (ms)</b>              | 2.98             | 393             | 20            | 1.04                                  |
| <b>TI (ms)</b>              | 900              | 1800            |               |                                       |
| <b>Flip Angle (°)</b>       | 9                |                 | 15            | 10                                    |
| <b>FOV (mm)</b>             | 256×256          | 256×256         | 220           | 225×240                               |
| <b>Slice thickness (mm)</b> | 1                | 1               | 2             | 3                                     |
| <b>Matrix</b>               | 256×256          | 256×256         | 512×512       | 180×192                               |
| <b>Voxel size</b>           | 1×1×1            | 1×1×1           | 0.43×0.43×2   | 1.25×1.25×3                           |
| <b>NEX</b>                  | 1                | 1               | 1             |                                       |
| <b>GRAPPA factor</b>        | 2                | 2               | 2             |                                       |
| <b>Other features</b>       |                  |                 |               | 60 dynamics, 10 s temporal resolution |

3D MPRAGE: three-dimensional magnetization prepared-rapid gradient echo; 3D FLAIR: three-dimensional fluid attenuated inversion recovery; 3D SWI: three-dimensional susceptibility-weighted imaging; DCE: dynamic-contrast enhancement; TR: repetition time; TE: time to echo; TI: inversion time; FOV: field of view; NEX: number of excitation; GRAPPA: GeneRalized autocalibrating partial parallel acquisition.
